# Supplementary material for: B,N,S tri-doped reduced graphite oxide–cobalt oxide composite: a bifunctional electrocatalyst for enhanced oxygen reduction and oxygen evolution reactions
Source: Royal Society of Chemistry journal article supplement (doi:10.1039/c8nj01138a), 2018-01-01
Supplement: c8nj01138a1.pdf [file c8nj01138a1.pdf]

## **Supporting Information**

### **B,N,S tri-doped Reduced Graphite Oxide-Cobalt Oxide Composite: A Bifunctional Electrocatalyst for Enhanced Oxygen Reduction and Oxygen Evolution Reaction**

Sagar B. Ingavale,<sup>[a]</sup> Indrajit M. Patil,<sup>[a,b]</sup> Haridas B. Parse<sup>[a,b]</sup> Niranjan Ramgir,<sup>[c]</sup> Bhalchandra  
Kakade,<sup>[a,b]\*</sup> and Anita Swami<sup>[a]\*</sup>

<sup>a</sup>Department of Chemistry, SRM Institute of Science & Technology, Kattankulathur – 603203,  
Chennai (India)

<sup>b</sup>SRM Research Institute, SRM Institute of Science & Technology, Kattankulathur – 603203,  
Chennai (India)

FAX: (+91) 44-2745 6702; Tel: (+91) 44-2741 7920

<sup>c</sup>Technical Physics Division, Bhabha Atomic Research Center, Mumbai – 400 085 (India)

\*Corresponding author E-mail: [swamianita.s@ktr.srmuniv.ac.in](mailto:swamianita.s@ktr.srmuniv.ac.in)

**Figure S1**

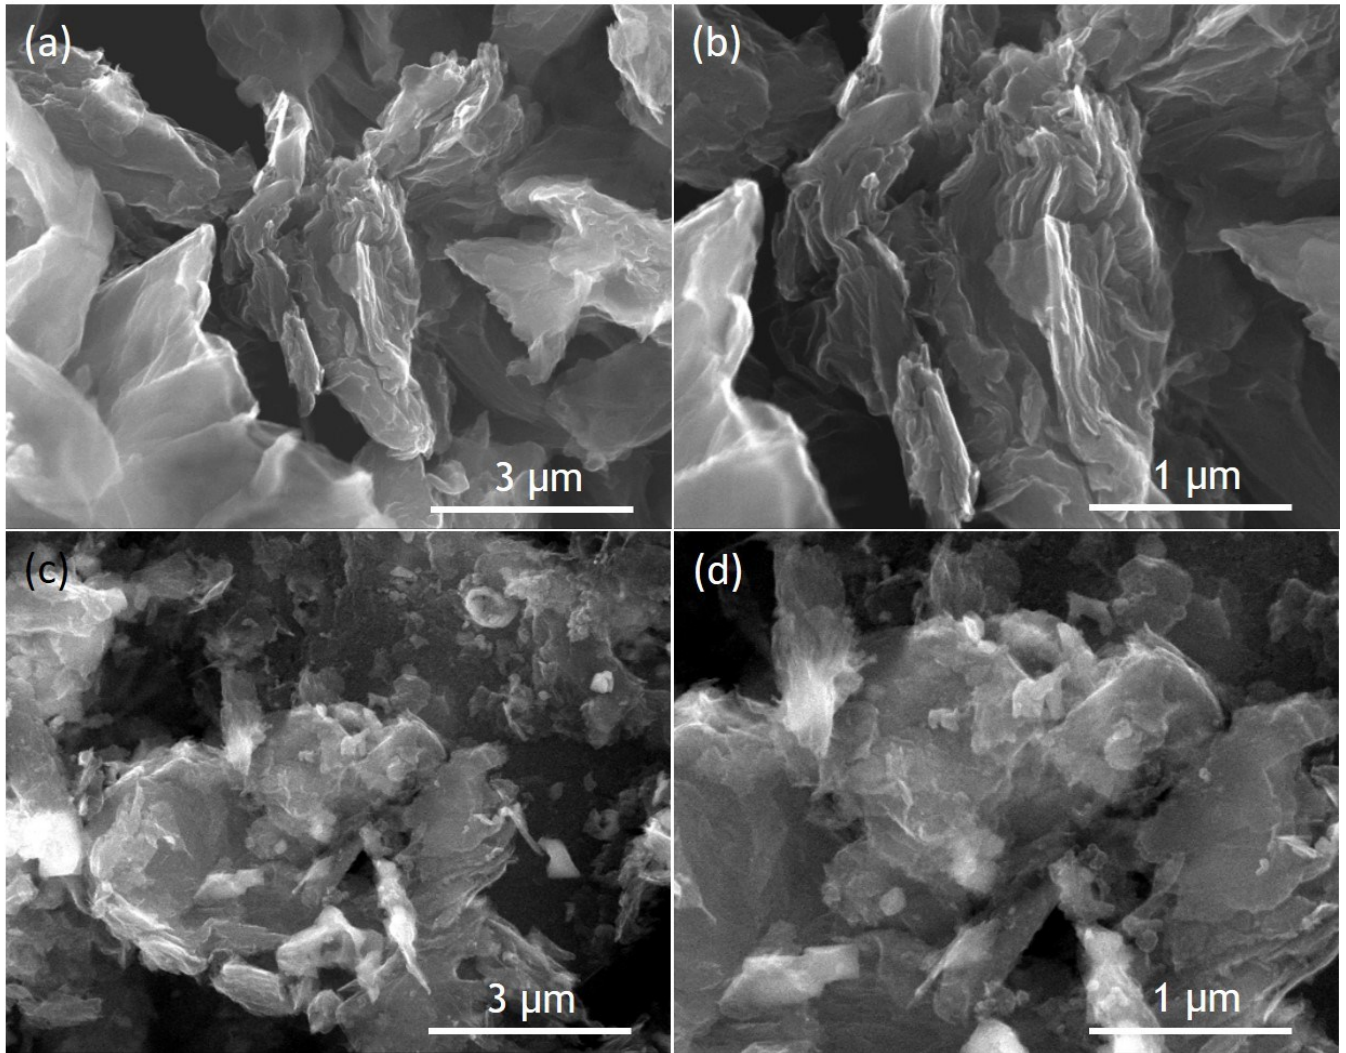

**Figure S1:** Low and high resolution SEM images of (a-b) NS/GO and (c-d) NS/rGO-Co7

Figure S2

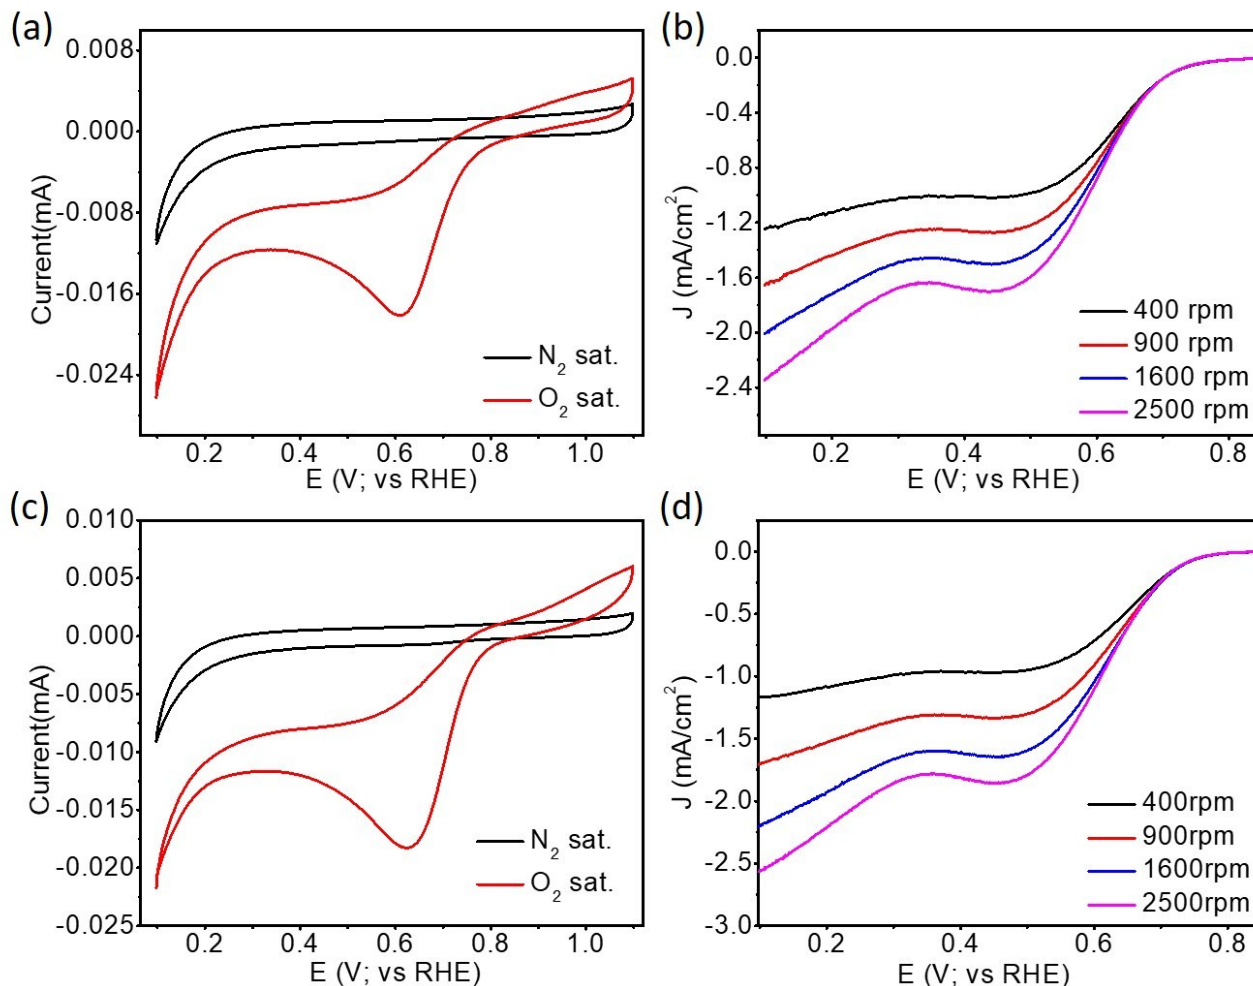

**Figure S2:** (a) Comparative CVs of BNS/GO in N<sub>2</sub> and O<sub>2</sub>-saturated 0.1 M KOH at a scan rate of 20 mV s<sup>-1</sup>; (b) LSV of BNS/GO catalyst under O<sub>2</sub>-saturated 0.1 M KOH recorded at various rotation speeds at scan rate 10 mV s<sup>-1</sup>; (c) comparative CVs of NS/GO in N<sub>2</sub> and O<sub>2</sub>-saturated 0.1 M KOH at a scan rate of 20 mV s<sup>-1</sup>; (d) LSV of NS/GO catalyst under O<sub>2</sub>-saturated 0.1 M KOH recorded at various rotation speeds at scan rate 10 mV s<sup>-1</sup>;

Figure S3

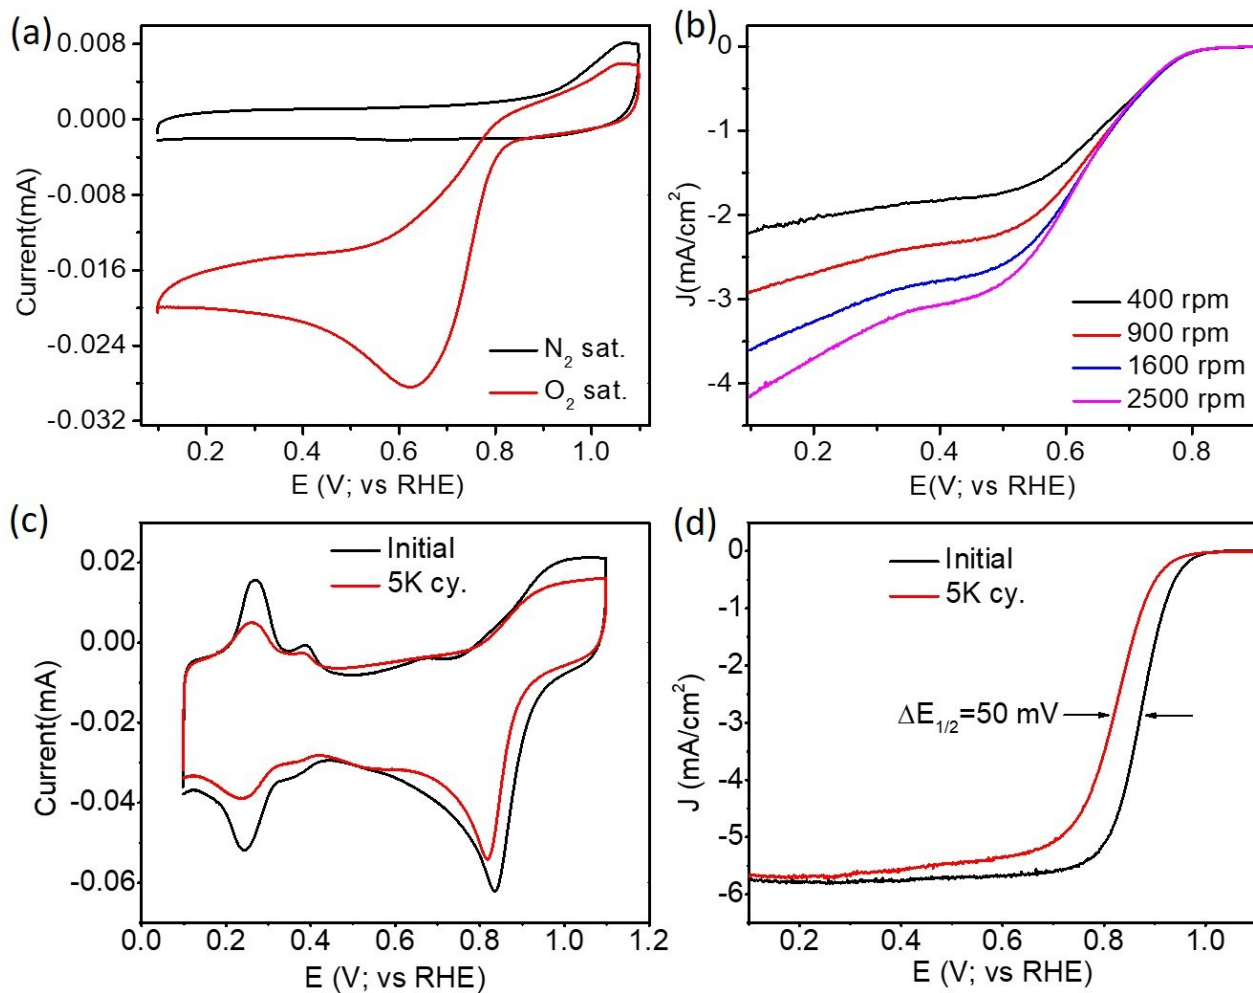

**Figure S3:** (a) Comparative CVs of NS/rGO-Co7 in N<sub>2</sub> and O<sub>2</sub>-saturated 0.1 M KOH at a scan rate of 20 mV s<sup>-1</sup>; (b) LSV of NS/rGO-Co7 catalyst under O<sub>2</sub>-saturated 0.1 M KOH recorded at various rotation speeds at scan rate 10 mV s<sup>-1</sup>; (c) comparative CV curves of commercial Pt/C catalyst before and after 5000 durability cycles in N<sub>2</sub> saturated 0.1 M KOH with scan rate 100 mV/s; (d) comparative LSV curves of commercial Pt/C at 1600 rpm with scan rate 10 mV/s before and after 5000 durability cycles;

**Figure S4**

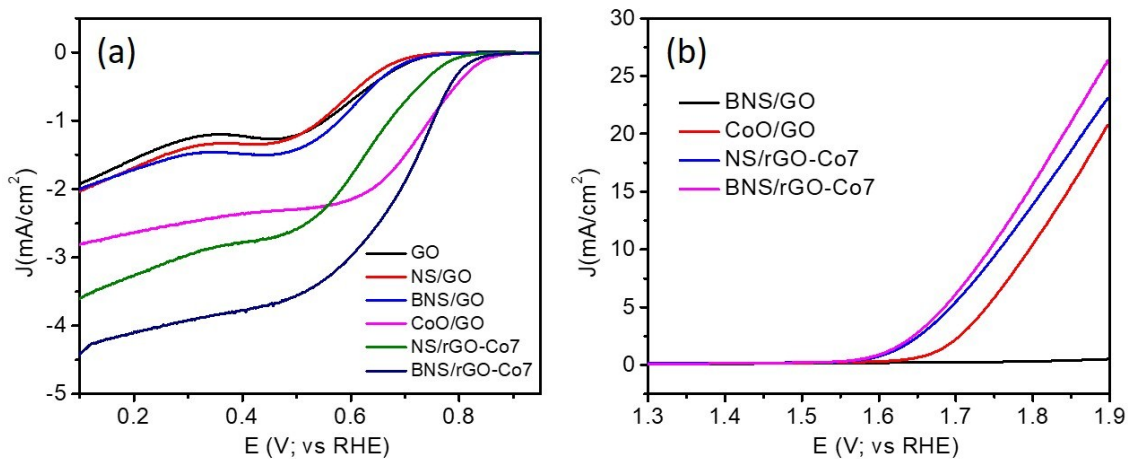

**Figure S4** (a) Comparative LSVs of various catalysts under  $O_2$ -saturated 0.1 M KOH, recorded at various rotation speeds at 25 °C (geo: geometric current density, scan rate 10 mV s<sup>-1</sup>); (b) comparative OER voltammograms of BNS/GO, CoO/GO, NS/rGO-Co7 and BNS/rGO-Co7 at 1600 rpm with scan rate of 10 mV/s;

**Table S1: Comparison of ORR activities of various prepared electrocatalysts**

| <b>Catalyst</b>    | <b>Onset Potential (V vs RHE)</b> | <b>E<sub>1/2</sub> (V; vs RHE)</b> | <b>Mass Activity (mA/mg)</b> |
|--------------------|-----------------------------------|------------------------------------|------------------------------|
| BNS/GO             | 0.76                              | 0.61                               | 43                           |
| BNS/rGO-Co4        | 0.81                              | 0.44                               | 48                           |
| <b>BNS/rGO-Co7</b> | <b>0.87</b>                       | <b>0.70</b>                        | <b>155</b>                   |
| BNS/rGO-Co15       | 0.84                              | 0.63                               | 84                           |
| BNS/rGO-Co25       | 0.82                              | 0.61                               | 62                           |
| BNS/rGO-Co50       | 0.84                              | 0.59                               | 48                           |

**Table S2: Comparison of catalytic performance of various electrocatalysts**

| Catalyst                                         | Catalyst loading (mg/cm <sup>2</sup> ) | ORR activities      |                                       | OER activities      |                                          |                        | Reference            |
|--------------------------------------------------|----------------------------------------|---------------------|---------------------------------------|---------------------|------------------------------------------|------------------------|----------------------|
|                                                  |                                        | Onset potential (V) | Current Density (mAcm <sup>-2</sup> ) | Electrolyte KOH (M) | Over potential at 10 mA cm <sup>-2</sup> | Onset potential vs RHE |                      |
| Comm. Pt/C                                       | 0.113                                  | 1.02                | 5.8                                   | 0.1                 | 410                                      | 1.66                   | Present study        |
| Pt-NB/G                                          | 0.102                                  | 1.08                | 5.5                                   | 0.1                 | -                                        | -                      | 1                    |
| Pt2Pd/NPG 700                                    | 0.159                                  | 0.98                | 4.1                                   | 0.1                 | -                                        | -                      | 2                    |
| Comm. RuO <sub>2</sub>                           | -                                      | -                   | -                                     | 1.0                 | 377                                      | -                      | 3                    |
| RuO <sub>2</sub> /Co <sub>3</sub> O <sub>4</sub> | 0.285                                  | N/A                 | N/A                                   | 1.0                 | 305                                      | N/A                    | 4                    |
| RuO <sub>2</sub>                                 | 0.255                                  | -                   | -                                     | 0.1                 | 670                                      | 1.51                   | 5                    |
| IrO <sub>2</sub>                                 | 0.255                                  | -                   | -                                     | 0.1                 | 750                                      | 1.57                   | 5                    |
| N-GQDs/Co <sub>3</sub> O <sub>4</sub>            | 0.70                                   | 0.698               | 2.3                                   | 0.1                 | 330                                      | 1.55                   | 6                    |
| Co <sub>3</sub> O <sub>4</sub> /NRGO             | 0.211                                  | 0.89                | 3.6                                   | 1.0                 | 420                                      | N/A                    | 7                    |
| Co <sub>3</sub> ZnC/Co@CN                        | 0.344                                  | 0.81                | 3.7                                   | 1.0                 | 366                                      | N/A                    | 3                    |
| CoS <sub>2</sub> (400)/N,S-GO                    | 0.25                                   | 0.97                | 4.4                                   | 0.1                 | 380                                      | N/A                    | 8                    |
| N-CG-CoO                                         | 0.70                                   | 0.9                 | 1.7                                   | 1.0                 | 340                                      | 1.30                   | 9                    |
| <b>BNS/rGO-Co7</b>                               | <b>0.113</b>                           | <b>0.87</b>         | <b>4.4</b>                            | <b>0.1</b>          | <b>510</b>                               | <b>1.58</b>            | <b>Present study</b> |
